# Supplementary material for: Synthesis and reactivity of silylated tetrathiafulvalenes
Source: Royal Society of Chemistry journal article supplement (doi:10.1039/b803947j), 2008-01-01

## Supplementary Information for

### Synthesis and reactivity of silylated tetrathiafulvalenes

**Aurélien Hameau,<sup>a</sup> Fabrice Guyon,<sup>\*a</sup> Michael Knorr,<sup>a</sup> Christian Däschlein,<sup>b</sup> Carsten Strohmann,<sup>\*b</sup> and Narcis Avarvari<sup>c</sup>**

<sup>a</sup> *Institut UTINAM, UMR CNRS 6213, Université de Franche-Comté,  
Faculté des Sciences et des Techniques, 16, Route de Gray, 25030 Besançon, France.  
E-mail: [fabrice.guyon@univ-fcomte.fr](mailto:fabrice.guyon@univ-fcomte.fr)*

<sup>b</sup> *Institut für Anorganische Chemie der Universität Würzburg,  
Am Hubland, D-97074 Würzburg, Germany  
E-mail: [c.strohmann@mail.uni-wuerzburg.de](mailto:c.strohmann@mail.uni-wuerzburg.de)*

<sup>c</sup> *Laboratoire Chimie Ingénierie Moléculaire et Matériaux (CIMMA), UMR 6200, 2 boulevard  
Lavoisier, 49045 Angers, France*

**Figure S1.**  $^{29}\text{Si}\{^1\text{H}\}$  and 2D-HMQC spectra of **8**

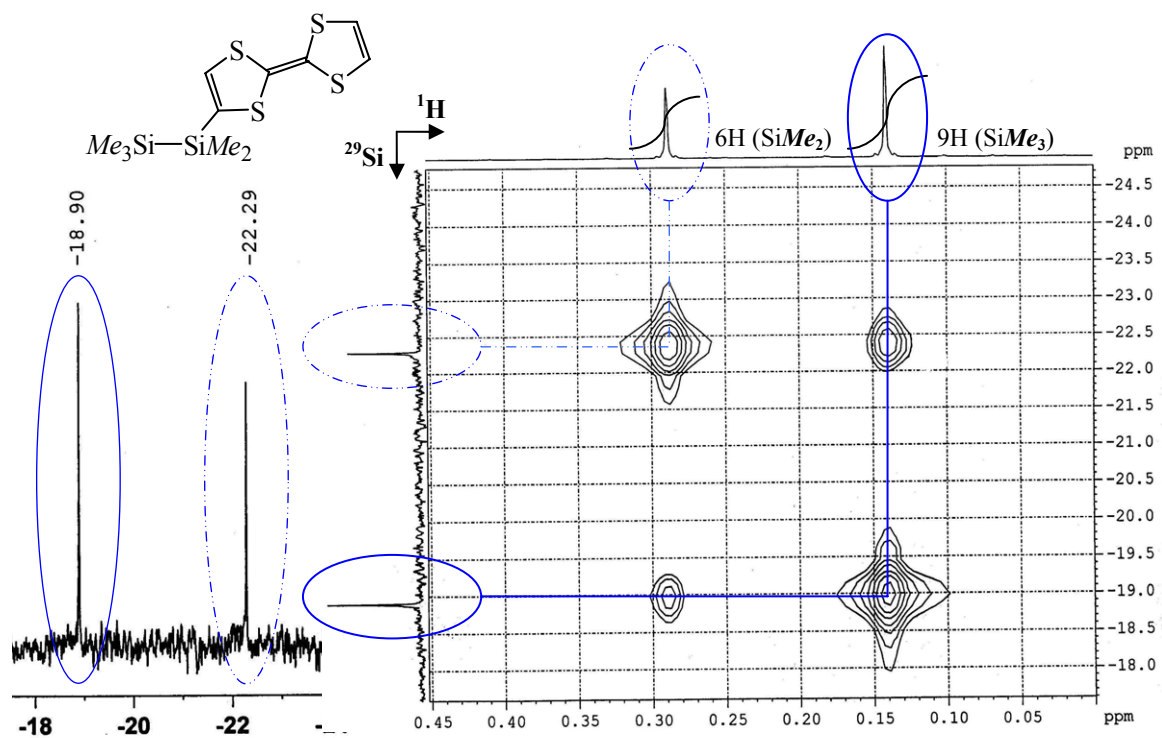

## Computational Studies

All calculations were done with predetermined symmetry. Starting coordinates were taken from the crystal structure analysis of the TTF substituted silanes **11** and **12** prior to energy optimization at the B3LYP/6-31+G(d) level. Additional harmonic vibrational frequency analyses (to establish the nature of stationary point on the potential energy surface) were performed on the same level and showed no imaginary frequency. Table S2 lists the total and zero-point energy of **11** and **12**. Standard orientations of the model systems can be found in tables S3, S4, S5 and S6.

**Table S1** Results from Quantum Chemical Studies on the model systems..

| model               | total energy (Hartree) | zero point energy (Hartree) |
|---------------------|------------------------|-----------------------------|
| <b>11 (crystal)</b> | -4385.026652           | -4384.731717                |
| <b>conf-11</b>      | -4385.026811           | -4384.731813                |
| <b>12 (crystal)</b> | -4015.672340           | -4015.452788                |
| <b>conf-12</b>      | -4015.673568           | -4015.454053                |

**Table S2** Standard Orientation of **11**.

| atomic symbol | X             | Y             | Z             |
|---------------|---------------|---------------|---------------|
| H             | 0.1779385364  | -0.5627214558 | -3.4064206888 |
| H             | 1.6160721527  | -0.5971252013 | -2.3685321819 |
| C             | 0.5386003187  | -0.7976692088 | -2.3969820542 |
| H             | 8.4521919839  | -1.3056002627 | -2.2466856112 |
| H             | 0.4033270805  | -1.8727526424 | -2.2291332239 |
| H             | -0.4617085194 | 2.3361539044  | -2.4935518375 |
| H             | -2.1516000085 | -1.9335512123 | -2.4284292312 |
| C             | 7.9362442243  | -0.7812454396 | -1.4500822648 |
| C             | -2.7358258879 | -1.1994622188 | -1.8831696963 |
| S             | -4.483723515  | -1.442716043  | -1.9089972726 |
| H             | 9.3851247116  | 0.7411997051  | -0.9916745904 |

|    |               |               |               |
|----|---------------|---------------|---------------|
| C  | 8.4216380574  | 0.2833917682  | -0.797149361  |
| C  | -0.1135349969 | 2.0996818676  | -1.4802856591 |
| C  | -2.213921964  | -0.1377549495 | -1.2373448534 |
| S  | 6.363983692   | -1.4082223616 | -0.9547870496 |
| H  | 0.9476955233  | 2.3695894011  | -1.4157847458 |
| Si | -0.3599160632 | 0.2572837063  | -1.1030291807 |
| S  | -7.4482429317 | -0.9690895736 | -0.5035341434 |
| C  | -4.8250660468 | -0.1202477979 | -0.7640961178 |
| H  | -0.6632794643 | 2.7424951382  | -0.7823453546 |
| C  | -6.0325240295 | 0.0745086645  | -0.1876335514 |
| S  | -3.414500195  | 0.9329969213  | -0.4718596225 |
| C  | 6.0325240295  | -0.0745086645 | 0.1876335514  |
| S  | 7.4482429317  | 0.9690895736  | 0.5035341434  |
| C  | -8.4216380574 | -0.2833917682 | 0.797149361   |
| S  | 3.414500195   | -0.9329969213 | 0.4718596225  |
| H  | -9.3851247116 | -0.7411997051 | 0.9916745904  |
| C  | 4.8250660468  | 0.1202477979  | 0.7640961178  |
| S  | -6.363983692  | 1.4082223616  | 0.9547870496  |
| H  | 0.6632794643  | -2.7424951382 | 0.7823453546  |
| C  | -7.9362442243 | 0.7812454396  | 1.4500822648  |
| H  | -0.9476955233 | -2.3695894011 | 1.4157847458  |
| C  | 2.213921964   | 0.1377549495  | 1.2373448534  |
| Si | 0.3599160632  | -0.2572837063 | 1.1030291807  |
| H  | -8.4521919839 | 1.3056002627  | 2.2466856112  |
| C  | 0.1135349969  | -2.0996818676 | 1.4802856591  |
| S  | 4.483723515   | 1.442716043   | 1.9089972726  |
| C  | 2.7358258879  | 1.1994622188  | 1.8831696963  |
| H  | 2.1516000085  | 1.9335512123  | 2.4284292312  |
| H  | 0.4617085194  | -2.3361539044 | 2.4935518375  |
| H  | -0.4033270805 | 1.8727526424  | 2.2291332239  |
| C  | -0.5386003187 | 0.7976692088  | 2.3969820542  |

|   |               |              |              |
|---|---------------|--------------|--------------|
| H | -1.6160721527 | 0.5971252013 | 2.3685321819 |
| H | -0.1779385364 | 0.5627214558 | 3.4064206888 |

---

**Table S3** Standard Orientation of **conf-11**.

| atomic symbol | X             | Y             | Z             |
|---------------|---------------|---------------|---------------|
| C             | -0.0350583976 | 0.010840792   | -0.0607302326 |
| C             | 0.0987432542  | 0.0091935871  | 8.0971651382  |
| C             | 1.6410432906  | 0.0526968613  | -2.951196609  |
| S             | 2.3346106049  | -0.0663160761 | -4.5702182207 |
| C             | -0.8460925313 | 0.9479307505  | 8.243231152   |
| C             | 2.5603325145  | -1.4057621166 | 0.9008871262  |
| C             | 2.4355031554  | -0.0669147896 | -1.8692382371 |
| S             | 1.2698333741  | 0.2104947253  | 6.7944216049  |
| Si            | 1.8597706539  | 0.0684143561  | -0.063817179  |
| S             | 4.9512069886  | 0.2516404877  | -6.5807538966 |
| C             | 4.0216448277  | -0.1026723097 | -3.9964402471 |
| C             | 5.0910019855  | 0.0292934327  | -4.8132132048 |
| S             | 4.1554554524  | -0.3526487254 | -2.2344434539 |
| C             | 0.4587577032  | 1.6397163179  | 6.0915144969  |
| S             | -0.8406207348 | 2.3076867823  | 7.1208116024  |
| C             | 6.6567709031  | 0.6360664135  | -6.8103200706 |
| S             | 2.1200747221  | 1.5233684895  | 3.8786165434  |
| C             | 0.8045777876  | 2.170298249   | 4.8970451354  |
| S             | 6.7781444703  | -0.0149358906 | -4.2254062901 |
| C             | 7.4746615232  | 0.5164070969  | -5.75578898   |
| C             | 1.7338798645  | 2.4851106265  | 2.4302374938  |
| Si            | 2.6399259426  | 2.1434138751  | 0.79568362    |
| C             | 2.2225470619  | 3.5563507419  | -0.3974948296 |
| S             | 0.009836325   | 3.5996836738  | 4.18806567    |
| C             | 0.7773369565  | 3.4173101497  | 2.6092842347  |
| C             | 4.5044370296  | 2.1082251325  | 1.13875113    |

|   |               |               |               |
|---|---------------|---------------|---------------|
| H | -0.4005824434 | -0.9292071346 | -0.4928427787 |
| H | -0.4092857964 | 0.0742847864  | 0.9680636862  |
| H | -0.4812419435 | 0.8403478783  | -0.6222670428 |
| H | 0.2134314181  | -0.8571667108 | 8.7390313433  |
| H | 0.566902256   | 0.2012754907  | -2.9101067173 |
| H | -1.6029670217 | 0.947300911   | 9.0196720795  |
| H | 2.1990612912  | -2.3501045689 | 0.474529271   |
| H | 2.2486114656  | -1.3659599601 | 1.9516503429  |
| H | 3.6563764894  | -1.4294587024 | 0.8789164949  |
| H | 6.9710065097  | 0.927889096   | -7.8062156671 |
| H | 8.5434163645  | 0.6978569239  | -5.7790863947 |
| H | 1.1493821538  | 3.6194809555  | -0.6137710531 |
| H | 2.7396146483  | 3.4036583207  | -1.3524156368 |
| H | 2.5461620258  | 4.5232631301  | 0.0078458893  |
| H | 0.4409676189  | 4.1061637727  | 1.8412379811  |
| H | 4.7769346072  | 1.3295730879  | 1.8610641228  |
| H | 5.0645552058  | 1.9172074838  | 0.2154042146  |
| H | 4.838353588   | 3.0708366432  | 1.5461472847  |

**Table S4** Standard Orientation of **12**.

| atomic symbol | X             | Y            | Z             |
|---------------|---------------|--------------|---------------|
| S             | 0.0004213274  | 0.0039130535 | 0.0000041287  |
| S             | 0.0004211825  | 0.0039133003 | 7.575068056   |
| S             | 2.8954062521  | 0.0020220148 | -1.6099458414 |
| S             | 2.8954061575  | 0.0020220962 | 9.1850179372  |
| C             | -0.9355551219 | 0.4073449994 | 6.1376097488  |
| C             | -0.9355549992 | 0.407344811  | 1.4374624036  |
| C             | 4.6098631786  | 0.4117704162 | 9.2336099883  |
| C             | 4.6098632276  | 0.4117705187 | -1.6585379803 |
| C             | 1.3351370384  | 1.1215948282 | 7.1900854824  |
| C             | 1.335137071   | 1.1215947656 | 0.3849865559  |
| C             | 2.5188389102  | 1.120527638  | -0.2683800749 |
| C             | 2.5188389031  | 1.1205276228 | 7.8434520664  |

|    |               |               |               |
|----|---------------|---------------|---------------|
| C  | -3.1731794845 | 1.2001705213  | 3.7875359963  |
| C  | -0.5339000708 | 1.4146529052  | 2.2381126059  |
| C  | -0.5339001063 | 1.4146529741  | 5.3369594402  |
| C  | 5.036347215   | 1.4173782418  | -0.8825545434 |
| C  | 5.0363472596  | 1.4173780054  | 8.4576264298  |
| Si | -1.4561280863 | 1.9829874649  | 3.7875359997  |
| S  | 0.9445826561  | 2.2512119593  | 1.7097920465  |
| S  | 0.9445827034  | 2.2512119431  | 5.8652799028  |
| S  | 3.8495624295  | 2.2464541066  | 7.4512285202  |
| S  | 3.8495623157  | 2.2464543241  | 0.1238433026  |
| C  | -1.5549094382 | 3.8658225376  | 3.787535948   |
| H  | -1.8302126799 | -0.1858419405 | 5.9786091716  |
| H  | -1.8302124974 | -0.1858421996 | 1.5964630518  |
| H  | 5.2377821217  | -0.1554840654 | 9.911550949   |
| H  | 5.2377822161  | -0.1554839744 | -2.336478892  |
| H  | -3.7367584353 | 1.5188719544  | 4.6724677296  |
| H  | -3.1425440422 | 0.1043968272  | 3.7875360151  |
| H  | -3.7367584086 | 1.5188719175  | 2.9026042327  |
| H  | 6.0583316343  | 1.7777374817  | -0.8446544664 |
| H  | 6.058331718   | 1.777737128   | 8.4197262899  |
| H  | -0.5624419408 | 4.3320456087  | 3.7875359624  |
| H  | -2.087978543  | 4.225368645   | 4.6760738252  |
| H  | -2.0879784917 | 4.2253685985  | 2.8989980215  |

**Table S5** Standard Orientation of **conf-12**.

| atomic symbol | X             | Y             | Z             |
|---------------|---------------|---------------|---------------|
| S             | -0.4516146293 | 0.7412987386  | -3.9555420999 |
| S             | -0.7570783904 | 0.4246314923  | 3.9555420999  |
| S             | 2.6142411306  | 0.1192345061  | -5.042615508  |
| S             | -0.0250319502 | -2.6168391157 | 5.0426155081  |
| C             | -1.1499717287 | 1.52115929    | 2.6351491916  |
| C             | -1.5615775054 | 1.0944570601  | -2.6351491917 |
| C             | 0.2776153627  | -4.3225283854 | 4.7146334929  |
| C             | 4.329721218   | -0.121803563  | -4.7146334927 |
| C             | -1.0853327869 | -1.0550723603 | 3.0156487718  |

|    |               |               |               |
|----|---------------|---------------|---------------|
| C  | 1.0153110721  | 1.1226167516  | -3.0156487718 |
| C  | 2.2674749749  | 0.8671876143  | -3.4567453751 |
| C  | -0.7849853465 | -2.2972277044 | 3.4567453751  |
| C  | -3.9644978069 | 1.740410983   | -0.4306180936 |
| C  | -1.090546584  | 1.6098133426  | -1.4820973129 |
| C  | -1.6480344855 | 1.0318784738  | 1.4820973129  |
| C  | 4.8296056221  | 0.3874351924  | -3.5805718035 |
| C  | -0.2132949695 | -4.8404237158 | 3.5805718036  |
| Si | -2.1604955207 | 2.084058566   | -0.0000000001 |
| S  | 0.666180746   | 1.8814218587  | -1.4378858801 |
| S  | -1.8562162674 | -0.7334890358 | 1.4378858801  |
| S  | -1.1203941793 | -3.7745886478 | 2.5087974959  |
| S  | 3.731801692   | 1.2555710688  | -2.5087974959 |
| C  | -1.8820235066 | 3.8992641321  | 0.4306180934  |
| H  | -0.9800575844 | 2.5746167856  | 2.832234264   |
| H  | -2.608234231  | 0.8867235519  | -2.8322342641 |
| H  | 0.8302080783  | -4.8818240965 | 5.461290964   |
| H  | 4.908550285   | -0.6539006529 | -5.4612909638 |
| H  | -4.6073195107 | 2.0165241665  | 0.4140642136  |
| H  | -4.144708562  | 0.6804158756  | -0.6442356032 |
| H  | -4.2869427749 | 2.325323848   | -1.3006602848 |
| H  | 5.8698412051  | 0.3244709428  | -3.2811142026 |
| H  | -0.1129180638 | -5.8777178119 | 3.2811142028  |
| H  | -0.8292041357 | 4.1175229604  | 0.644235603   |
| H  | -2.4781666927 | 4.2004403575  | 1.3006602846  |
| H  | -2.1811023341 | 4.5317276392  | -0.4140642138 |

---



**Complete reference 30 of the publication:**

Gaussian 03 (Revision B.04), M. J. Frisch, G. W. Trucks, H. B. Schlegel, G. E. Scuseria, M. A. Robb, J. R. Cheeseman, J. A. Montgomery, Jr., T. Vreven, K. N. Kudin, J. C. Burant, J. M. Millam, S. S. Iyengar, J. Tomasi, V. Barone, B. Mennucci, M. Cossi, G. Scalmani, N. Rega, G. A. Petersson, H. Nakatsuji, M. Hada, M. Ehara, K. Toyota, R. Fukuda, J. Hasegawa, M. Ishida, T. Nakajima, Y. Honda, O. Kitao, H. Nakai, M. Klene, X. Li, J. E. Knox, H. P. Hratchian, J. B. Cross, C. Adamo, J. Jaramillo, R. Gomperts, R. E. Stratmann, O. Yazyev, A. J. Austin, R. Cammi, C. Pomelli, J. W. Ochterski, P. Y. Ayala, K. Morokuma, G. A. Voth, P. Salvador, J. J. Dannenberg, V. G. Zakrzewski, S. Dapprich, A. D. Daniels, M. C. Strain, O. Farkas, D. K. Malick, A. D. Rabuck, K. Raghavachari, J. B. Foresman, J. V. Ortiz, Q. Cui, A. G. Baboul, S. Clifford, J. Cioslowski, B. B. Stefanov, G. Liu, A. Liashenko, P. Piskorz, I. Komaromi, R. L. Martin, D. J. Fox, T. Keith, M. A. Al-Laham, C. Y. Peng, A. Nanayakkara, M. Challacombe, P. M. W. Gill, B. Johnson, W. Chen, M. W. Wong, C. Gonzalez, and J. A. Pople, Gaussian, Inc., Pittsburgh, PA, **2003**.

**Figure S2. Illustration of the two energetically comparable conformers found in the flexible silyl bridged TTF's**

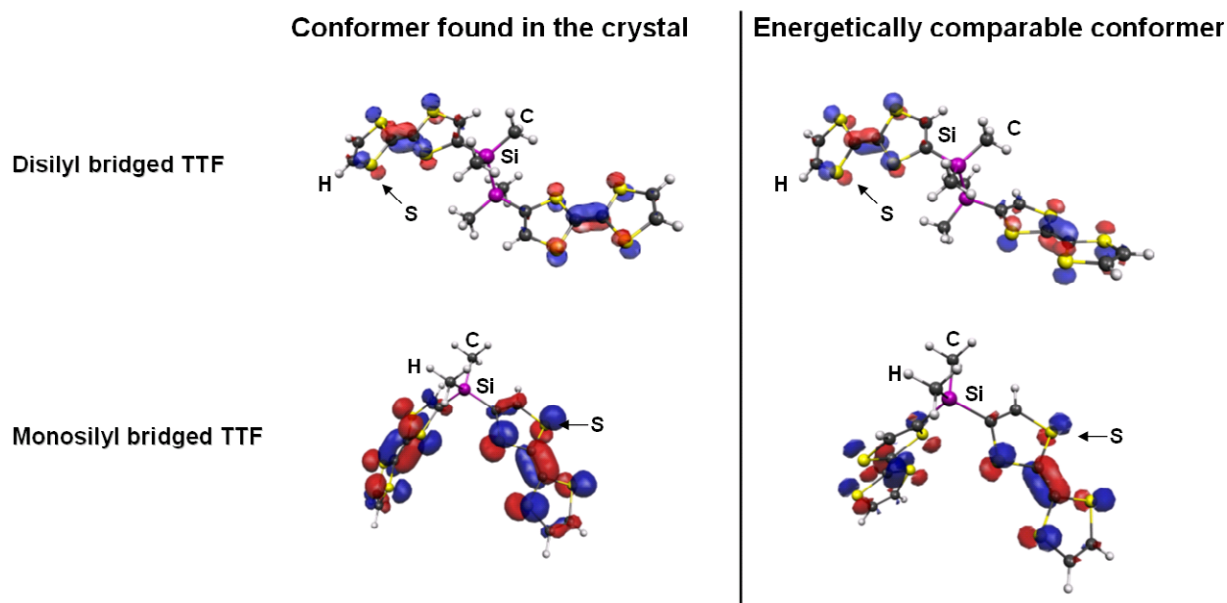

Supplement: b803947j.pdf [file b803947j.pdf]
